# Supplementary material
Source: HighWire-hosted journal article supplement (https://erj.ersjournals.com/content/58/5/2004252)
Supplement: inline-supplementary-material-1 [file inline-supplementary-material-1.pdf]

## **SUPPLEMENTAL MATERIAL & METHODS**

### **Crucial role of fatty acid oxidation in asthmatic bronchial smooth muscle remodeling**

Pauline Esteves<sup>1,2</sup>, Landry Blanc<sup>1,4</sup>, Alexis Celle<sup>1,2</sup>, Isabelle Dupin<sup>1,2</sup>, Elise Maurat<sup>1,2</sup>, Nivea Amoedo<sup>1,2</sup>, Guillaume Cardouat<sup>1,2</sup>, Olga Ousova<sup>1,2</sup>, Lara Gales<sup>5</sup>, Florian Bellvert<sup>5</sup>, Hugues Begueret<sup>3</sup>, Matthieu Thumerel<sup>1,2,3</sup>, Jean-William Dupuy<sup>1,4</sup>, Nicolas Desbenoit<sup>1,4</sup>, Roger Marthan<sup>1,2,3</sup>, Pierre-Olivier Girodet<sup>1,2,3</sup>, Rodrigue Rossignol<sup>1,2</sup>, Patrick Berger<sup>1,2,3\*</sup> and Thomas Trian<sup>1,2\*</sup>

### **AFFILIATIONS**

<sup>1</sup> Univ-Bordeaux, Centre de Recherche Cardio-thoracique de Bordeaux, U1045, MRGM, Functional Genomics Center (CGFB), CIC 1401, CELLOMET, F-33000 Bordeaux, France.

<sup>2</sup> INSERM, Centre de Recherche Cardio-thoracique de Bordeaux, U1045, U1211, CIC 1401, F-33000 Bordeaux, France.

<sup>3</sup> CHU de Bordeaux, Service d'exploration fonctionnelle respiratoire, Service de chirurgie thoracique, Service d'anatomopathologie, CIC 1401, Bordeaux, France

<sup>4</sup> CNRS, UMR5248, Institute of Chemistry & Biology of Membranes & Nano objects, Functional Genomics Center (CGFB), Proteomics Facility, Université de Bordeaux, 33000 Bordeaux, France

<sup>5</sup> Université de Toulouse, CNRS 5504, INRA 792, INSA Toulouse, Toulouse Biotechnology Institute, Bio & Chemical Engineering, MetaToul, Toulouse, France

\* Co-last author

## **MATERIALS AND METHODS**

### **Study population**

A total of 21 patients with asthma and 31 non asthmatic subjects were prospectively recruited from the “Centre Hospitalier Universitaire (CHU)” of Bordeaux, France, according to the Global Initiative for Asthma [1] and the American Thoracic Society criteria [2]. Asthmatic patients were recruited from the “COBRA” cohort (COhort of BRonchial obstruction and Asthma, ethics committee number: 2008-A00294-51/1) in the Clinical Investigation Center of Bordeaux (CIC, Hôpital Haut-Lévêque, Pessac, France). Non asthmatic control subjects were recruited after surgical resection. This study received approval from the local and national ethics committees. Bronchial specimens from all subjects were obtained by either fiberoptic bronchoscopy or lobectomy in macroscopically normal areas, as previously described [3].

### **Cell culture**

Bronchial smooth muscle (BSM) cells were obtained from patient biopsies and bronchi dissected out from lobectomy, as previously described [4]. Briefly, BSM cell culture was performed in DMEM 25 mM glucose (Gibco, Thermo Fisher Scientific, Waltham, MA), supplemented with 10% FBS (Gibco) and penicillin-streptomycin-amphotericin B 1X (100X; Gibco) and essential amino acids 1X (100X; Sigma-Aldrich, Saint-Louis, MO). The smooth muscle phenotype was confirmed by immunocytochemistry using the double staining of smooth muscle alpha-actin and calponin. Etomoxir and perhexilin were both purchased from Sigma-Aldrich and used at 10 nM each. Blocking anti-LDL-R antibody was purchased from Sigma and used at 5 µg/mL. Salmeterol, formoterol, fluticasone and budesonide were purchased from Sigma-Aldrich and used at concentrations of  $10^{-7}$ M,  $10^{-8}$ M or  $10^{-9}$ M.

Bronchial epithelial cell culture was established from bronchial brushings patients' biopsies and bronchi dissected out from lobectomy, as previously described in Trian et al. [5], using PneumaCult medium (Stemcell, Vancouver, Canada).

### **Lentiviral infection for genetic inhibition of CPT2 expression**

BSM cells were transduced with shRNA targeted against CPT2 or negative control (scrambled shRNA) at an MOI of 20. Lenti shRNA were purchased from Origene. Lentiblast (OZ Biosciences, San Diego, CA) was used as a transduction reagent following the manufacturer's recommendations. Knock-down was effective after 5 days of treatment as assessed by western blot.

### **Cellular oxygen consumption rate**

Cellular oxygen consumption rate (OCR) was measured in intact cells at 37°C in a 2 mL thermostatically monitored chamber ( $1.0 \times 10^6$  cells/ml /run) using an Oroboros O2k instrument (Oroboros Instruments, Innsbruck, Austria). High-resolution respirometry was determined under routine conditions (in DMEM), in the presence of 6  $\mu$ M oligomycin (leak respiration independent of ADP phosphorylation), or in the presence of 8  $\mu$ M carbonyl-cyanide m-chlorophenylhydrazone CCCP (maximal respiration obtained in the uncoupled state). The 'reserve capacity' corresponds to the difference between the maximal respiration (CCCP-stimulated) and the basal respiration obtained in the cell culture medium. Finally, the cellular non-mitochondrial respiration was obtained after inhibition of the respiratory chain using potassium cyanide (KCN).

### **Cellular and mitochondrial ATP synthesis**

Steady-state ATP content was measured by bioluminescence using the CellTiter Glo kit (Promega, Madison, WI), following the manufacturer's recommendations. The OXPHOS inhibitory cocktail contained 30  $\mu$ M oligomycin, 5  $\mu$ M rotenone and 1 mM potassium cyanide. ATP content was normalized to crystal violet staining representing cell density obtained at 570 nm.

### **Oxidative stress**

Oxyblots were performed on total cellular lysates using an OxyBlot protein detection kit (Merck Millipore, Burlington, MA) and 2,4-dinitrophenylhydrazine (2,4-DNPH) antibody.

### **Cell culture substrates concentration measurement**

Free fatty acid resting concentration in the cell culture medium was analysed after 48 hours following the manufacturer's recommendations from Abnova (Taipei, Taiwan). Both glucose and lactate concentrations were measured in the cell culture medium using a YSI Biochemistry Analyzer.

### **Metabolites analysis by IC-MS/MS**

BSM cells were incubated in DMEM without glucose (Life Invitrogen, Thermo Fisher Scientific) supplemented with 25 mM of [U-<sup>13</sup>C]-glucose (Sigma-Aldrich) for 48 hours before fast filtration preparation of the samples for mass spectrometry analysis. Extraction and quenching of metabolites were performed using a specific protocol from Metatoul (Metatoul, Toulouse, France) as previously described by Heuillet M. et al. Metabolites were analysed by ionic-exchange

chromatography coupled with tandem mass spectrometry (IC-MS/MS) using a previously described method [6].

### **Fatty acids endocytosis**

BSM cells were seeded at 10 000 cells in 8 well chamber slides. BSM cells were rapidly starved of FBS and incubated for 30 min in DMEM medium without FBS. Fluorescent BODIPY-ceramide was purchased from Life Invitrogen (Thermo Fisher Scientific) and used at 100 ug/mL following the manufacturer's recommendations. DAPI was used for nuclear staining.

### **Metabolic capability analysis – Biolog phenotype MicroArrays**

About 20 000 asthmatic and control BSM cells were seeded into 96-well MitoPlate™ S-1 and MitoPlate™ I-1 BIOLOG plates. The metabolic capability of cells was assessed via redox reactions associated with cellular respiration following the manufacturer's instructions (Biolog, Hayward, CA).

### **Cell proliferation assays**

For cell quantification, cells were trypsinized and counted at different time points. A BrdU cell proliferation colorimetric kit (Abcam, Cambridge, UK) was used following the manufacturer's instructions. BSM cells positive for Ki67 staining were analysed by flow cytometry.

### **Mitochondrial network immunostaining**

BSM cells were seeded into Nunc Lab-Tek chamber slides at 5000 cells per chamber. TOMM20 was used for mitochondrial network staining and visualized using fluorescence microscopy using

a Zeiss objective (ZEISS, Oberkochen, Germany) and a high-resolution colour camera (CIS Corporation, Japan). Images were reconstituted using ImageJ software. The area of TOMM20 staining, representing the mitochondrial network, was quantified using ImageJ software.

### **Apoptosis assessment**

Basal or induced apoptosis was analysed using tert-butyl-hydroxide at 100  $\mu$ M for half an hour using a luminescent assay measuring caspase 3 and 7 activities (Promega) in control and asthmatic BSM cells.

### **Western blot**

Total cell and biopsy lysis was performed using a RIPA lysis buffer (Sigma-Aldrich). Total cellular extracts were loaded onto a 4-20% SDS-PAGE gel (Bio-Rad, Hercules, CA) and transferred onto a nitrocellulose membrane. Different commercial antibodies were used directed against Porin (Abcam), Citrate Synthase (Cell Signaling, Leiden, Netherlands), TOMM20 (Santa Cruz Biotechnologies, Dallas, TX), CPT1/CPT2 (Abcam and Life Invitrogen) and LDL-R (Abcam). HRP-coupled secondary antibodies were used for revelation using a ChemiDoc imaging instrument (Bio-Rad). Protein expression was normalized using total loading protein intensity (Stain-Free system Bio-Rad).

### **Label-free quantitative proteomics**

Cells and tissue lysates were processed using RIPA buffer. Each lysate was centrifuged and the supernatant was used for the proteomic analysis at the Mass Spectrometry facility of Bordeaux

University, as recently described [7]. Briefly, proteomic analysis was performed using an Ultimate 3000 RSLC Nano-UPHLC system (Thermo Fisher Scientific, Waltham, MA) coupled to a nanospray Orbitrap Fusion™ Lumos™ Tribrid™ Mass Spectrometer (Thermo Fisher Scientific, Waltham, MA).

These analyses were performed by the proteomics core facility at the University of Bordeaux (<https://proteome.cgfb.u-bordeaux.fr/en>). The steps of sample preparation and protein digestion were performed as previously described [8]. NanoLC-MS/MS analysis was performed using an Ultimate 3000 RSLC Nano-UPHLC system (Thermo Fisher Scientific) coupled to a nanospray Orbitrap Fusion™ Lumos™ Tribrid™ Mass Spectrometer (Thermo Fisher Scientific). Each peptide extract was loaded on a 300 µm ID x 5 mm PepMap C18 precolumn (Thermo Fisher Scientific) at a flow rate of 10 µL/min. After a 3 min desalting step, peptides were separated on a 50 cm EasySpray column (75 µm ID, 2 µm C18 beads, 100 Å pore size, ES803, Thermo Fischer Scientific) with a 4-40% linear gradient of solvent B (0.1% formic acid in 80% ACN) in 48 min. The separation flow rate was set at 300 nL/min. The mass spectrometer was operated in positive ion mode at a 2.0 kV needle voltage. Data were acquired using Xcalibur 4.1 software in a data-dependent mode. MS scans ( $m/z$  375-1500) were recorded at a resolution of  $R = 120000$  (@  $m/z$  200) and an AGC target of  $4 \times 10^5$  ions collected within 50 ms, followed by a top speed duty cycle of up to 3 seconds for MS/MS acquisition. Precursor ions (2 to 7 charge states) were isolated in the quadrupole with a mass window of 1.6 Th and fragmented with HCD@30% normalized collision energy. MS/MS data were acquired in the ion trap with rapid scan mode, AGC target of  $3 \times 10^3$  ions and a maximum injection time of 300 ms. Selected precursors were excluded for 60 seconds. For protein identification, Sequest HT and Mascot 2.4 algorithms were used through

Proteome Discoverer 1.4 Software (Thermo Fisher Scientific) for protein identification in batch mode by searching against a UniProt Homo sapiens database (71 536 entries, release March 2018). Two missed enzyme cleavages were allowed. Mass tolerances in MS and MS/MS were set to 10 ppm and 0.6 Da. Oxidation of methionine, deamidation of asparagine and glutamine, acetylation of lysine and N-terminal acetylation of the protein were searched as dynamic modifications. Carbamidomethylation on cysteine was searched as a static modification. Peptide validation was performed using the Percolator algorithm [9] and only “high confidence” peptides were retained corresponding to a 1% false discovery rate (FDR) at the peptide level. Raw LC-MS/MS data were imported into Progenesis QI (version 2.0 ; Nonlinear Dynamics, a Waters Company) for feature detection, alignment, and quantification. All sample features were aligned according to retention times by manually inserting up to fifty landmarks followed by automatic alignment to maximally overlay all the two-dimensional (m/z and retention time) feature maps. Singly charged ions and ions with charge states higher than six were excluded from the analysis. All remaining features were used to calculate a normalization factor for each sample to correct for experimental variation. Peptide identifications (with FDR < 1%) were imported into Progenesis. Univariate one-way analysis of variance (ANOVA) was performed within Progenesis LC-MS to calculate the protein p-value according to the sum of the normalized abundances across all runs. Only proteins with a p-value cut-off < 0.05 were validated. A minimum of two unique peptides matched to a protein, and a  $\geq 1.2$ -fold change in relative abundance between the two conditions (n = 5 in each group) were used as the criteria for identification as a differentially expressed protein. Noticeably, only non-conflicting features and unique peptides were considered for calculation at the protein level. The mass spectrometry proteomics data have been deposited to the ProteomeXchange Consortium via the PRIDE [10] partner repository with the dataset identifier PXD015566. Proteins were



clustered according to their functions by using the Kyoto Encyclopedia of Genes and Genome Analysis in the search tool for retrieval of interactions between genes and proteins (STRING) database. A more global analysis of the data was performed using Ingenuity Pathway Analysis (IPA; Qiagen). We used the ‘Core Analysis’ package to identify relationships, mechanisms, functions, and pathways relevant to a dataset. We also used the ‘regulators’ package to identify predicted regulators of the proteomic changes. Comparative analyses were also performed with IPA using the ‘Comparative Analysis’ module.

### **Matrix-Assisted Laser Desorption/Ionization (MALDI) - mass spectrometry imaging analysis**

Patient biopsies were frozen at -80°C and then embedded in a gel of 5% carboxymethyl cellulose. Serial cryosections (12 µm-thick) were cut from bronchial biopsies at -20°C using a NX70 Star cryostat (Thermo Fisher Scientific) and thaw-mounted onto standard glass microscope slides for MALDI - mass spectrometry imaging. These acquisitions were performed using a high performance atmospheric pressure imaging ion source named AP-SMALDI 5 AF (TransMIT GmbH) connected to an orbital trapping mass spectrometer (QExactive Orbitrap, Thermo Fisher Scientific). After MALDI - mass spectrometry imaging, we performed an  $\alpha$ -smooth muscle actin immunostaining to localize the BSM area. We then estimated the relative lipid content within the BSM on the MALDI images. Fatty acid annotation was performed using the Human Metabolome Data Base and METASPACE software.

## **MALDI Acquisition**

For the MALDI-MSI (matrix-assisted laser desorption/ionization) analysis of fatty acids, a homogenous matrix layer of 1,5-diaminonaphthalene (DAN, Sigma-Aldrich) was deposited using a home-built pneumatic sprayer [11]. Briefly, 150  $\mu$ L of a 5 mg/ml of DAN matrix diluted in 70% acetone (30% mQ water) was applied to the tissues under the following optimized conditions: a 0.05 mL/min matrix solution flow rate and 0.9 bar of nitrogen gas flow rate. The matrix solution was supplemented with 1-palmitoyl-d31-2-oleoyl-sn-glycero-3-phosphate (16:0-d31-18:1 PA, Avanti Polar Lipid) at 0.2 mg/ml used as internal mass calibration during MS acquisition (the selected peak with the strongest signal was 16:0-d30-18:1 PA, [M - H]<sup>-</sup>  $m/z$  703.6697  $\pm$  0.003) and with palmitic acid-d31 (Sigma-Aldrich) at 0.2 mg/ml used as internal standards for fatty acid normalization ([M - H]<sup>-</sup> signal ( $m/z$  286.4275  $\pm$  0.003)). MALDI-MSI acquisitions were performed using a high performance atmospheric pressure imaging ion source named AP-SMALDI5 AF (TransMIT GmbH) connected to an orbital trapping mass spectrometer (QExactive Orbitrap, Thermo Fisher Scientific) [12]. This latter was operated in negative ion mode at a mass resolution of 70 000 at  $m/z$  400 over a mass range of  $m/z$  190-2000. The ion source was equipped with a diode laser (Flare NX343,  $\lambda$  = 343 nm), operating at a repetition rate of 2 kHz. Imaging data were acquired in high speed continuous mode with a pixel size of 18  $\mu$ m and a speed rate of 3.7 pixels/s. Fatty acid annotation was performed using the Human Metabolome Data Base (HMDB) and METASPACE software [13] based on peak exact mass and isotope profiles. MALDI images were generated using MSiReader software [14]. Normalized ion images of fatty acids were generated by dividing the given fatty acid signal by the palmitic acid-d31 signal ( $m/z$  286.4275  $\pm$  0.003).

## **Co-registration of MALDI-MS images and histology**

Following the acquisition of the MALDI images, the matrix was washed from the tissue surface by immersing the tissue for 10 seconds into a bath of 50% of acetone. Tissue sections were immersed in acetone before rapid permeabilization in PBS 1X- Triton 0.01% for 5 min. After rinsing in PBS 1X-Tween 0.1%, slides were incubated with blocking solution for 20 min with PBS 1X- 0.5% BSA. Tissue sections were incubated for 45 min at room temperature with  $\alpha$ -Smooth Muscle Actin-FITC (Thermo Fisher Scientific). Tissue sections were then washed with PBS 1X-Tween 0.1% and incubated with nuclear staining DAPI for 5 min at room temperature. Tissue sections were mounted using an aqueous mounting medium (Sigma-Aldrich). Slides were scanned by using a digital slide scanner (NanoZoomer, Hamamatsu, Shizuoka, Japan) (Supplemental figure 1). Images were read by using NDP view software (Hamamatsu). Immunohistochemistry (IHC) and MALDI images were aligned as previously described [15, 16]. Briefly, for alignment, MALDI images of ion maps of  $m/z$  885.549 (an endogenous phospholipid) and  $m/z$  593.8317 (a matrix-related ion) were used to reveal the contours of the tissue border (Supplemental figure 9). The MALDI image was rescaled and aligned with the tissue bright field image using the contour and tissue defaults as guides. Then, the IHC image can be cropped at the size of the MALDI image to be loaded into MSiReader software. In this way, the confocal image is aligned with the whole MSI dataset allowing us to define ROIs based on the BSM area and epithelial area. To have the same robustness for all samples despite different BSM areas, we defined a measuring box with a size of 3x3 pixels (Supplemental figure 10) and performed in each tissue 18 measurements of fatty acid abundances in the different areas presenting BSM or epithelial cells in each tissue.

## REFERENCES

1. Reddel HK, Hurd SS, FitzGerald JM. World Asthma Day. GINA 2014: a global asthma strategy for a global problem. *Int J Tuberc Lung Dis* 2014; 18(5): 505-506.
2. Crapo RO, Casaburi R, Coates AL, Enright PL, Hankinson JL, Irvin CG, MacIntyre NR, McKay RT, Wanger JS, Anderson SD, Cockcroft DW, Fish JE, Sterk PJ. Guidelines for methacholine and exercise challenge testing-1999. This official statement of the American Thoracic Society was adopted by the ATS Board of Directors, July 1999. *Am J Respir Crit Care Med* 2000; 161(1): 309-329.
3. Bara I, Ozier A, Girodet PO, Carvalho G, Cattiaux J, Begueret H, Thumerel M, Ousova O, Kolbeck R, Coyle AJ, Woods J, Tunon de Lara JM, Marthan R, Berger P. Role of YKL-40 in bronchial smooth muscle remodeling in asthma. *Am J Respir Crit Care Med* 2012; 185(7): 715-722.
4. Trian T, Benard G, Begueret H, Rossignol R, Girodet PO, Ghosh D, Ousova O, Vernejoux JM, Marthan R, Tunon-de-Lara JM, Berger P. Bronchial smooth muscle remodeling involves calcium-dependent enhanced mitochondrial biogenesis in asthma. *J Exp Med* 2007; 204(13): 3173-3181.
5. Trian T, Allard B, Dupin I, Carvalho G, Ousova O, Maurat E, Bataille J, Thumerel M, Begueret H, Girodet PO, Marthan R, Berger P. House dust mites induce proliferation of severe asthmatic smooth muscle cells via an epithelium-dependent pathway. *Am J Respir Crit Care Med* 2015; 191(5): 538-546.
6. Heuillet M, Bellvert F, Cahoreau E, Letisse F, Millard P, Portais JC. Methodology for the Validation of Isotopic Analyses by Mass Spectrometry in Stable-Isotope Labeling Experiments. *Anal Chem* 2018; 90(3): 1852-1860.
7. Henriet E, Abou Hammoud A, Dupuy JW, Dartigues B, Ezzoukry Z, Dugot-Senant N, Leste-Lasserre T, Pallares-Lupon N, Nikolski M, Le Bail B, Blanc JF, Balabaud C, Bioulac-Sage P, Raymond AA, Saltel F. Argininosuccinate synthase 1 (ASS1): A marker of unclassified hepatocellular adenoma and high bleeding risk. *Hepatology* 2017; 66(6): 2016-2028.
8. Esteves P, Dard L, Brillac A, Hubert C, Sarlak S, Rousseau B, Dumon E, Izotte J, Bonneau M, Lacombe D, Dupuy JW, Amoedo N, Rossignol R. Nuclear control of lung cancer cells migration, invasion and bioenergetics by eukaryotic translation initiation factor 3F. *Oncogene* 2019.
9. Kall L, Canterbury JD, Weston J, Noble WS, MacCoss MJ. Semi-supervised learning for peptide identification from shotgun proteomics datasets. *Nat Methods* 2007; 4(11): 923-925.
10. Perez-Riverol Y, Csordas A, Bai J, Bernal-Llinares M, Hewapathirana S, Kundu DJ, Inuganti A, Griss J, Mayer G, Eisenacher M, Perez E, Uszkoreit J, Pfeuffer J, Sachsenberg T,

Yilmaz S, Tiwary S, Cox J, Audain E, Walzer M, Jarnuczak AF, Ternent T, Brazma A, Vizcaino JA. The PRIDE database and related tools and resources in 2019: improving support for quantification data. *Nucleic Acids Res* 2019; 47(D1): D442-D450.

11. Bouschen W, Schulz O, Eikel D, Spengler B. Matrix vapor deposition/recrystallization and dedicated spray preparation for high-resolution scanning microprobe matrix-assisted laser desorption/ionization imaging mass spectrometry (SMALDI-MS) of tissue and single cells. *Rapid Commun Mass Spectrom* 2010; 24(3): 355-364.

12. Kompauer M, Heiles S, Spengler B. Atmospheric pressure MALDI mass spectrometry imaging of tissues and cells at 1.4- $\mu\text{m}$  lateral resolution. *Nat Methods* 2017; 14(1): 90-96.

13. Palmer A, Phapale P, Chernyavsky I, Lavigne R, Fay D, Tarasov A, Kovalev V, Fuchser J, Nikolenko S, Pineau C, Becker M, Alexandrov T. FDR-controlled metabolite annotation for high-resolution imaging mass spectrometry. *Nat Methods* 2017; 14(1): 57-60.

14. Robichaud G, Garrard KP, Barry JA, Muddiman DC. MSiReader: an open-source interface to view and analyze high resolving power MS imaging files on Matlab platform. *J Am Soc Mass Spectrom* 2013; 24(5): 718-721.

15. Blanc L, Daudelin IB, Podell BK, Chen PY, Zimmerman M, Martinot AJ, Savic RM, Prideaux B, Dartois V. High-resolution mapping of fluoroquinolones in TB rabbit lesions reveals specific distribution in immune cell types. *Elife* 2018; 7.

16. Blanc L, Lenaerts A, Dartois V, Prideaux B. Visualization of Mycobacterial Biomarkers and Tuberculosis Drugs in Infected Tissue by MALDI-MS Imaging. *Anal Chem* 2018; 90(10): 6275-6282.

**Supplemental table S1: Representation of protein expression among “mitochondrial dysfunction” annotation box**

| Protein     | Uniprot accession number | Log2 (Fold Change) | -Log10 (p value) |
|-------------|--------------------------|--------------------|------------------|
| <b>CPT2</b> | <b>P23786</b>            | <b>1.615</b>       | <b>1.789</b>     |
| NDUFB11     | Q9NX14                   | 1.187              | 1.571            |
| CASP8       | E7EQ06                   | 1.161              | 1.748            |
| SLC27A3     | H7BZH4                   | 1.118              | 0.232            |
| TXNRD2      | Q9NNW7                   | 0.891              | 1.054            |
| MT-ND1      | P03886                   | 0.846              | 1.819            |
| NDUFS8      | E9PKH6                   | 0.758              | 1.865            |
| NDUFA10     | A0A087WXC5               | 0.733              | 2.798            |
| ACAA1       | P09110                   | 0.684              | 1.972            |
| FIS1        | Q9Y3D6                   | 0.621              | 2.638            |
| SDHC        | Q99643                   | 0.516              | 0.143            |
| CYB5A       | P00167                   | 0.509              | 1.228            |
| NDUFAF2     | Q8N183                   | 0.472              | 1.590            |
| NDUFB9      | Q9Y6M9                   | 0.467              | 1.370            |
| GPX4        | A0A0A0MTT1               | 0.462              | 0.635            |
| MAP2K4      | P45985                   | 0.430              | 0.745            |
| NDUFA7      | O95182                   | 0.404              | 0.592            |
| ACSL1       | P33121                   | 0.391              | 0.895            |
| NDUFS6      | O75380                   | 0.382              | 0.528            |

|          |        |       |       |
|----------|--------|-------|-------|
| GPX7     | Q96SL4 | 0.377 | 0.671 |
| NDUFA9   | Q16795 | 0.353 | 0.960 |
| NDUFS5   | O43920 | 0.333 | 0.849 |
| IVD      | P26440 | 0.318 | 1.131 |
| NDUFV1   | G3V0I5 | 0.307 | 0.767 |
| ECHS1    | P30084 | 0.300 | 1.144 |
| NDUFA6   | P56556 | 0.283 | 1.057 |
| NDUFA5   | Q16718 | 0.280 | 0.441 |
| NDUFB10  | O96000 | 0.273 | 2.184 |
| NDUFS2   | O75306 | 0.253 | 0.908 |
| ECI1     | P42126 | 0.253 | 0.489 |
| HSD17B10 | Q99714 | 0.250 | 1.405 |
| HSD17B10 | Q99714 | 0.250 | 1.405 |
| ACAA2    | P42765 | 0.250 | 0.893 |
| NDUFS1   | P28331 | 0.242 | 0.738 |
| GSR      | P00390 | 0.236 | 0.513 |
| NDUFA8   | P51970 | 0.235 | 1.687 |
| NDUFA12  | Q9UI09 | 0.234 | 0.380 |
| APP      | H7C0V9 | 0.231 | 0.273 |
| ACO2     | A2A274 | 0.220 | 0.917 |
| HADH     | Q16836 | 0.213 | 0.557 |
| OGDH     | Q02218 | 0.207 | 0.726 |
| PRDX5    | P30044 | 0.195 | 0.509 |

|         |            |       |       |
|---------|------------|-------|-------|
| NDUFA11 | Q86Y39     | 0.179 | 0.056 |
| ATP5PD  | O75947     | 0.172 | 0.639 |
| NDUFS3  | O75489     | 0.167 | 0.909 |
| NDUFA13 | Q9P0J0     | 0.161 | 0.458 |
| MT-ND2  | P03891     | 0.154 | 0.356 |
| NDUFV2  | P19404     | 0.153 | 0.479 |
| CYB5R3  | P00387     | 0.143 | 0.920 |
| NDUFB6  | O95139     | 0.138 | 1.078 |
| PARK7   | Q99497     | 0.135 | 0.832 |
| PRDX3   | P30048     | 0.124 | 0.635 |
| NDUFB7  | P17568     | 0.107 | 0.315 |
| UQCRC1  | P31930     | 0.087 | 0.371 |
| CYC1    | P08574     | 0.085 | 0.363 |
| CPT1A   | P50416     | 0.084 | 0.332 |
| NDUFB4  | O95168     | 0.083 | 0.117 |
| UQCRFS1 | P47985     | 0.081 | 0.242 |
| CYCS    | P99999     | 0.079 | 0.566 |
| ECI2    | A0A0C4DGA2 | 0.077 | 0.086 |
| RHOT2   | Q8IXI1     | 0.073 | 0.152 |
| ATP5F1A | P25705     | 0.070 | 0.340 |
| ATP5F1B | P06576     | 0.065 | 0.393 |
| COX5B   | P10606     | 0.061 | 0.063 |
| ATP5PO  | P48047     | 0.057 | 0.295 |



|         |            |        |       |
|---------|------------|--------|-------|
| ATP5F1C | P36542     | 0.055  | 0.361 |
| UQCRC2  | P22695     | 0.055  | 0.220 |
| NDUFB5  | E7EWP0     | 0.045  | 0.198 |
| MAOA    | P21397     | 0.036  | 0.088 |
| MAPK10  | A0A286YF97 | 0.036  | 0.048 |
| ATP5PB  | Q5QNZ2     | 0.034  | 0.217 |
| COX6B1  | P14854     | 0.029  | 0.076 |
| PDHA1   | P08559     | 0.019  | 0.079 |
| HSD17B4 | P51659     | 0.007  | 0.001 |
| HADHA   | P40939     | 0.003  | 0.019 |
| ACO1    | P21399     | 0.001  | 0.012 |
| NCSTN   | Q92542     | 0.000  | 0.018 |
| MT-CO2  | P00403     | -0.006 | 0.016 |
| SDHB    | P21912     | -0.013 | 0.024 |
| ATP5F1D | P30049     | -0.014 | 0.043 |
| HADHB   | P55084     | -0.014 | 0.009 |
| COX4I1  | P13073     | -0.029 | 0.145 |
| HTRA2   | A0A0C4DG44 | -0.045 | 0.078 |
| ATP5MF  | P56134     | -0.058 | 0.285 |
| MT-ATP6 | P00846     | -0.059 | 0.153 |
| GPD2    | P43304     | -0.076 | 0.203 |
| NDUFB3  | O43676     | -0.076 | 0.141 |
| MAPK8   | A6NF29     | -0.092 | 0.243 |

|         |            |        |       |
|---------|------------|--------|-------|
| MT-CO3  | P00414     | -0.094 | 0.027 |
| SOD2    | P04179     | -0.110 | 0.100 |
| ACSL3   | O95573     | -0.118 | 0.605 |
| COX7C   | P15954     | -0.145 | 0.419 |
| SCP2    | P22307     | -0.153 | 0.525 |
| SDHA    | P31040     | -0.158 | 0.369 |
| AIFM1   | O95831     | -0.166 | 0.394 |
| ACADM   | B7Z9I1     | -0.179 | 0.581 |
| CAT     | P04040     | -0.200 | 0.483 |
| UQCRB   | P14927     | -0.213 | 0.600 |
| CASP3   | P42574     | -0.225 | 1.435 |
| VDAC3   | Q9Y277     | -0.240 | 0.524 |
| VDAC1   | P21796     | -0.256 | 0.662 |
| UQCRRQ  | O14949     | -0.271 | 1.444 |
| VDAC2   | A0A0A0MR02 | -0.315 | 0.713 |
| ATP5MG  | E9PN17     | -0.335 | 1.412 |
| COX5A   | H3BRM5     | -0.347 | 1.788 |
| NDUFA4  | O00483     | -0.371 | 0.907 |
| SLC27A4 | Q6P1M0     | -0.390 | 1.505 |
| COX7A2L | E5RJZ1     | -0.487 | 0.277 |
| COX6C   | P09669     | -0.490 | 1.361 |
| ATP5ME  | P56385     | -0.520 | 3.013 |
| ACSL4   | O60488     | -0.882 | 0.427 |
