# Supplementary material
Source: HighWire-hosted journal article supplement (https://erj.ersjournals.com/content/58/5/2004252)
Supplement: inline-supplementary-material-12 [file inline-supplementary-material-12.pdf]

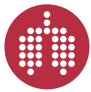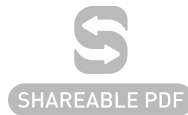

# Crucial role of fatty acid oxidation in asthmatic bronchial smooth muscle remodelling

Pauline Esteves<sup>1,2</sup>, Landry Blanc<sup>1,3</sup>, Alexis Celle<sup>1,2</sup>, Isabelle Dupin <sup>1,2</sup>, Elise Maurat<sup>1,2</sup>, Nivea Amoedo<sup>1,2</sup>, Guillaume Cardouat<sup>1,2</sup>, Olga Ousova<sup>1,2</sup>, Lara Gales<sup>4</sup>, Florian Bellvert <sup>4</sup>, Hugues Begueret<sup>5</sup>, Matthieu Thumerel <sup>1,2,5</sup>, Jean-William Dupuy <sup>1,3</sup>, Nicolas Desbenoit<sup>1,3</sup>, Roger Marthan<sup>1,2,5</sup>, Pierre-Olivier Girodet<sup>1,2,5</sup>, Rodrigue Rossignol<sup>1,2</sup>, Patrick Berger <sup>1,2,5,6</sup> and Thomas Trian<sup>1,2,6</sup>

<sup>1</sup>Centre de Recherche Cardio-thoracique de Bordeaux, U1045, MRGM, Functional Genomics Center (CGFB), CIC 1401, CELLOMET, Univ-Bordeaux, Bordeaux, France. <sup>2</sup>Centre de Recherche Cardio-thoracique de Bordeaux, U1045, U1211, CIC 1401, INSERM, Bordeaux, France. <sup>3</sup>CNRS, UMR5248, Institute of Chemistry and Biology of Membranes and Nano Objects, Functional Genomics Center (CGFB), Proteomics Facility, Université de Bordeaux, Bordeaux, France. <sup>4</sup>CNRS 5504, INRA 792, INSA Toulouse, Toulouse Biotechnology Institute, Bio & Chemical Engineering, Université de Toulouse, MetaToul, Toulouse, France. <sup>5</sup>Service d'exploration fonctionnelle respiratoire, Service de chirurgie thoracique, Service d'anatomopathologie, CIC 1401, CHU de Bordeaux, Bordeaux, France. <sup>6</sup>Co-last author.

Corresponding author: Thomas Trian ([thomas.trian@u-bordeaux.fr](mailto:thomas.trian@u-bordeaux.fr))

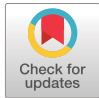

Shareable abstract (@ERSpublications)

**Metabolic remodelling towards mitochondrial fatty acid metabolism increases ATP production in asthmatic bronchial smooth muscle cells. Fatty acid metabolism inhibition decreases asthmatic bronchial smooth muscle cell proliferation.** <https://bit.ly/3fyx6Ft>

**Cite this article as:** Esteves P, Blanc L, Celle A, *et al.* Crucial role of fatty acid oxidation in asthmatic bronchial smooth muscle remodelling. *Eur Respir J* 2021; 58: 2004252 [DOI: 10.1183/13993003.04252-2020].

This single-page version can be shared freely online.

## Abstract

**Background** Bronchial smooth muscle (BSM) remodelling in asthma is related to an increased mitochondrial biogenesis and enhanced BSM cell proliferation in asthma. Since mitochondria produce the highest levels of cellular energy and fatty acid  $\beta$ -oxidation is the most powerful way to produce ATP, we hypothesised that, in asthmatic BSM cells, energetic metabolism is shifted towards the  $\beta$ -oxidation of fatty acids.

**Objectives** We aimed to characterise BSM cell metabolism in asthma both *in vitro* and *ex vivo* to identify a novel target for reducing BSM cell proliferation.

**Methods** 21 asthmatic and 31 non-asthmatic patients were enrolled. We used metabolomic and proteomic approaches to study BSM cells. Oxidative stress, ATP synthesis, fatty acid endocytosis, metabolite production, metabolic capabilities, mitochondrial networks, cell proliferation and apoptosis were assessed on BSM cells. Fatty acid content was assessed *in vivo* using matrix-assisted laser desorption/ionisation spectrometry imaging.

**Results** Asthmatic BSM cells were characterised by an increased rate of mitochondrial respiration with a stimulated ATP production and mitochondrial  $\beta$ -oxidation. Fatty acid consumption was increased in asthmatic BSM both *in vitro* and *ex vivo*. Proteome remodelling of asthmatic BSM occurred *via* two canonical mitochondrial pathways. The levels of carnitine palmitoyl transferase (CPT)2 and low-density lipoprotein (LDL) receptor, which internalise fatty acids through mitochondrial and cell membranes, respectively, were both increased in asthmatic BSM cells. Blocking CPT2 or LDL receptor drastically and specifically reduced asthmatic BSM cell proliferation.

**Conclusion** This study demonstrates a metabolic switch towards mitochondrial  $\beta$ -oxidation in asthmatic BSM and identifies fatty acid metabolism as a new key target to reduce BSM remodelling in asthma.

Copyright ©The authors 2021. For reproduction rights and permissions contact [permissions@ersnet.org](mailto:permissions@ersnet.org)

This article has supplementary material available from [erj.ersjournals.com](http://erj.ersjournals.com)

This article has an editorial commentary: <https://doi.org/10.1183/13993003.01565-2021>

Received: 18 Nov 2021  
Accepted: 26 March 2021
